# Supplementary material for: Exosomal miR-152-5p and miR-3681-5p function as potential biomarkers for ST-segment elevation myocardial infarction
Source: PubMed Central journal article supplement (PMC9243048; doi:10.1016/j.clinsp.2022.100038), 2022-06-22
Supplement: mmc1.pdf [file mmc1.pdf]

**Supporting Table 1** Primer sequences of identified genes.

| <b>miRNA</b>       | <b>Primer sequence (5'–3')</b> |
|--------------------|--------------------------------|
| <b>H-U6</b>        | CTCGCTTCGGCAGCACAT             |
| <b>miR-152-5p</b>  | AGGTTCTGTGATACTCCGACT          |
| <b>miR-3681-5p</b> | TAGTGGATGATGCACTCTGTGC         |
